# Supplementary material for: Amphiphilic titania Janus nanoparticles containing ionic groups prepared in oil–water Pickering emulsion
Source: Royal Society of Chemistry journal article supplement (doi:10.1039/d3nr04907h), 2024-01-01
Supplement: d3nr04907h1.pdf [file d3nr04907h1.pdf]

## Supporting Information

# Amphiphilic Titania Janus Nanoparticles Containing Ionic Groups prepared in Oil-Water Pickering Emulsion

Lucas Niedner<sup>a</sup>, Guido Kickelbick<sup>a,b\*</sup>

[a] Saarland University, Inorganic Solid State Chemistry, Campus, Building C4 1,  
66123 Saarbrücken, Germany

[b] Saarene – Saarland Center for Energy Materials and Sustainability, Campus C4 2, 66123  
Saarbrücken, Germany

E-mail: [guido.kickelbick@uni-saarland.de](mailto:guido.kickelbick@uni-saarland.de)

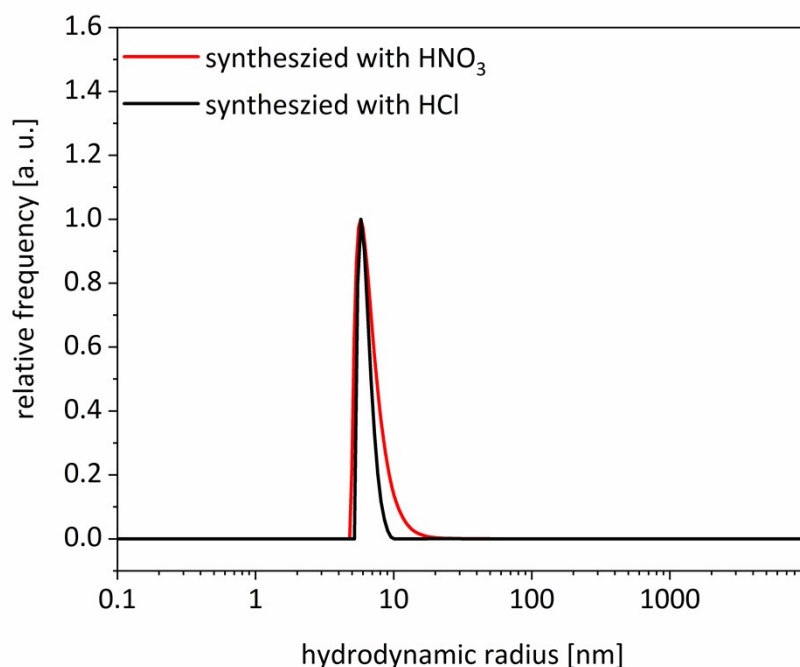

**Figure S1:** Number weighted DLS of titania particles dispersed in water, synthesized with aq. HNO<sub>3</sub> (red) and aq. HCl (black).

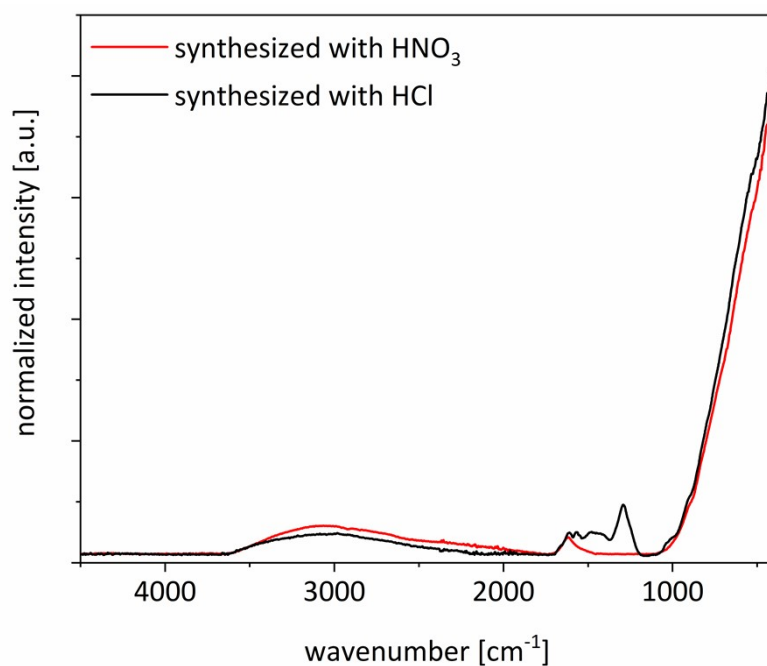

**Figure S2:** FTIR spectra of titania nanoparticles synthesized with aq.  $\text{HNO}_3$  (red) and aq.  $\text{HCl}$  (black).

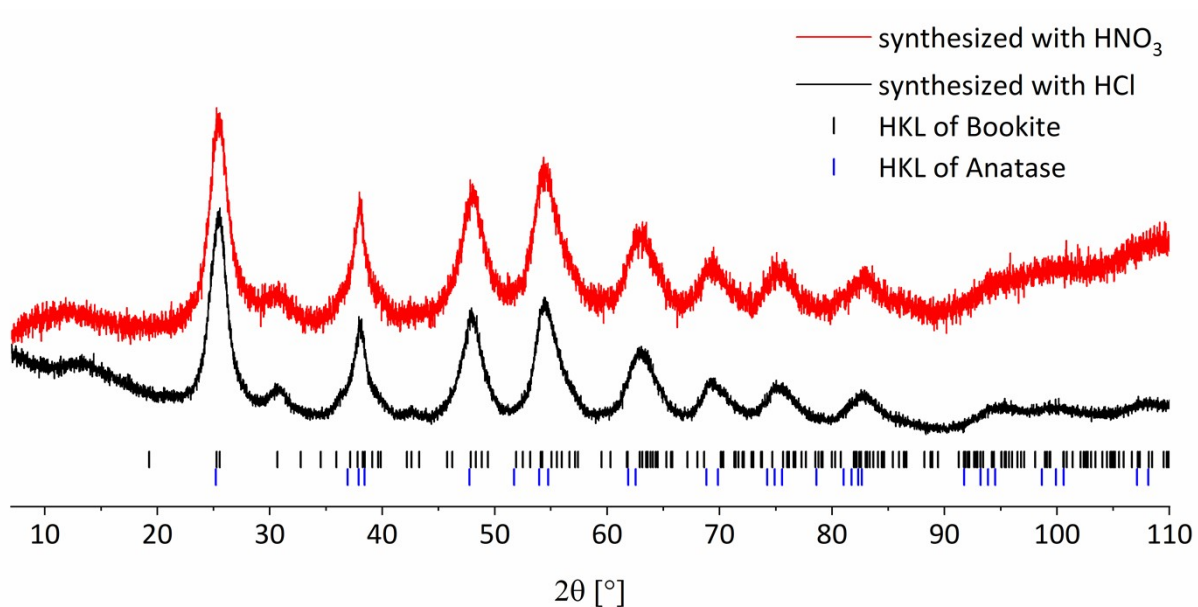

**Figure S3:** XRD of titania particles synthesized with aq.  $\text{HNO}_3$  (black) and aq.  $\text{HCl}$  (red).

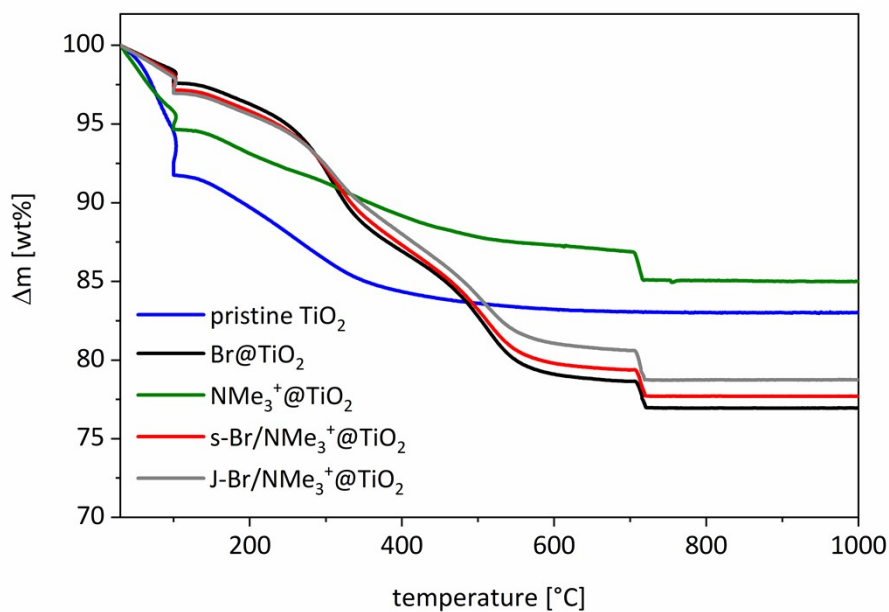

**Figure S4:** TGA curves from 30 °C to 1000 °C.

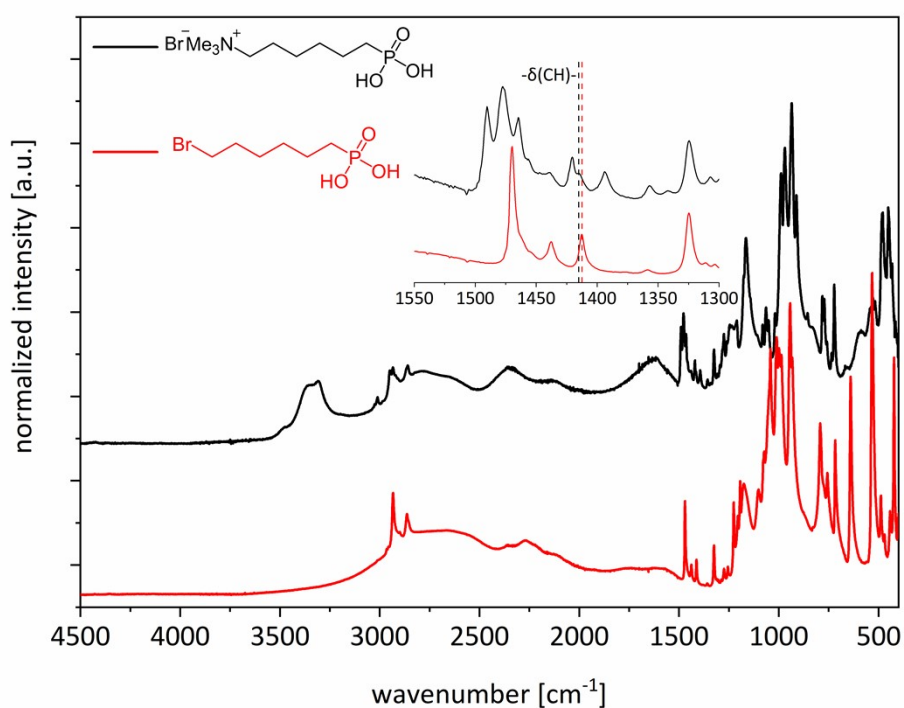

**Figure S5:** FTIR spectra of 6-Bromohexylphosphonic acid (BrC<sub>6</sub>PA, red) and *N,N,N*-trimethyl-6-phosphonohexan-1-aminium bromide (NMe<sub>3</sub><sup>+</sup>C<sub>6</sub>PA, black).

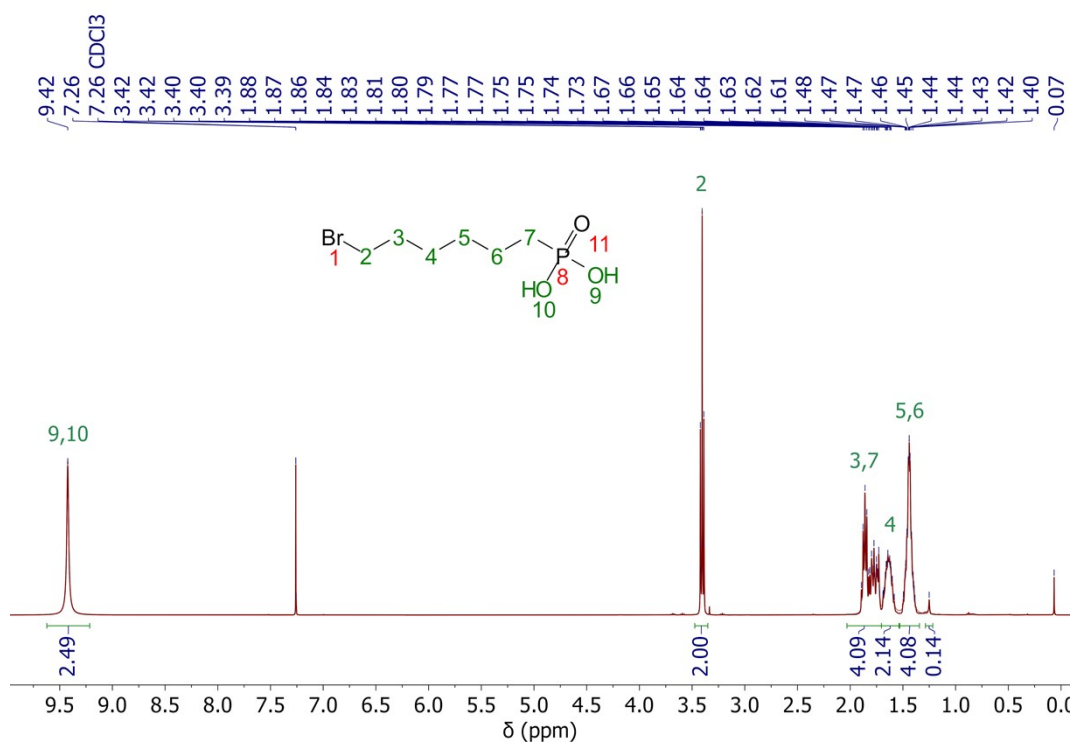

Figure S6: <sup>1</sup>H NMR spectrum of BrC<sub>6</sub>PA.

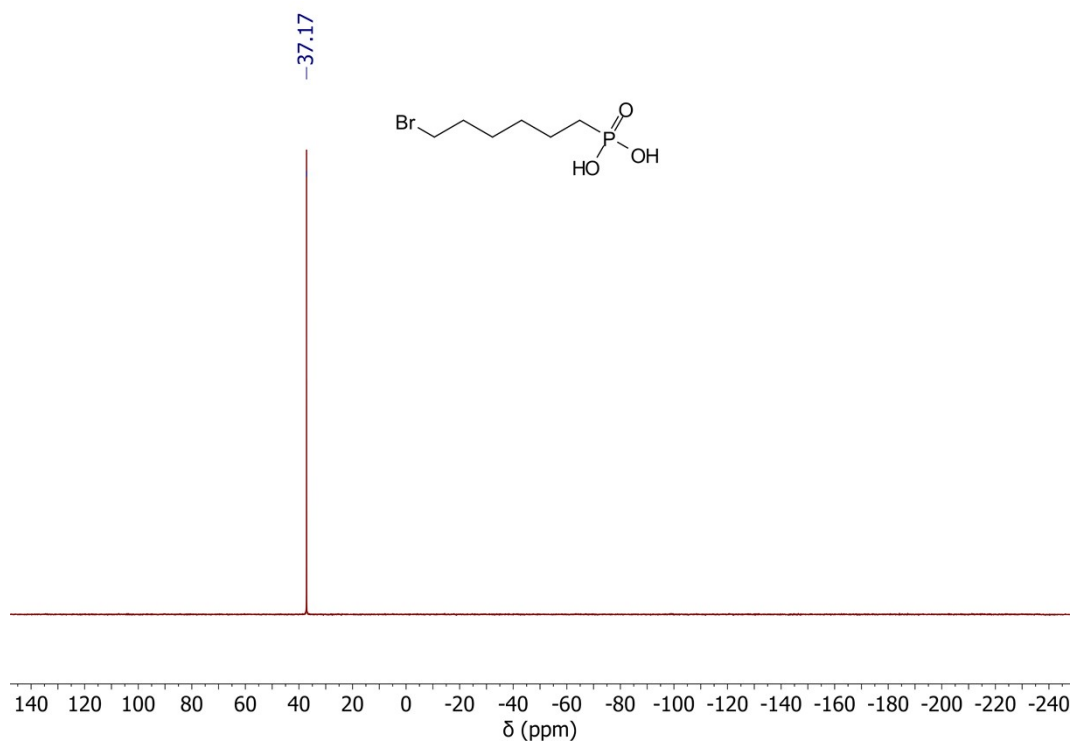

Figure S7: <sup>31</sup>P NMR spectrum of BrC<sub>6</sub>PA.

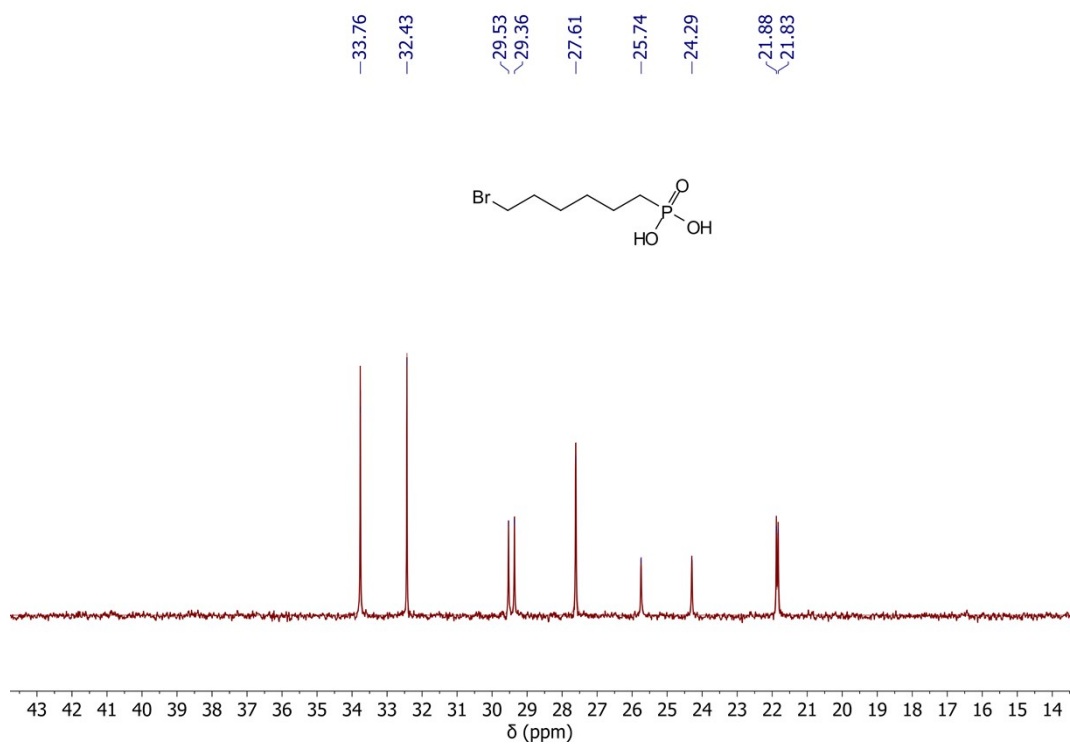

Figure S8: <sup>13</sup>C NMR spectrum of BrC<sub>6</sub>PA.

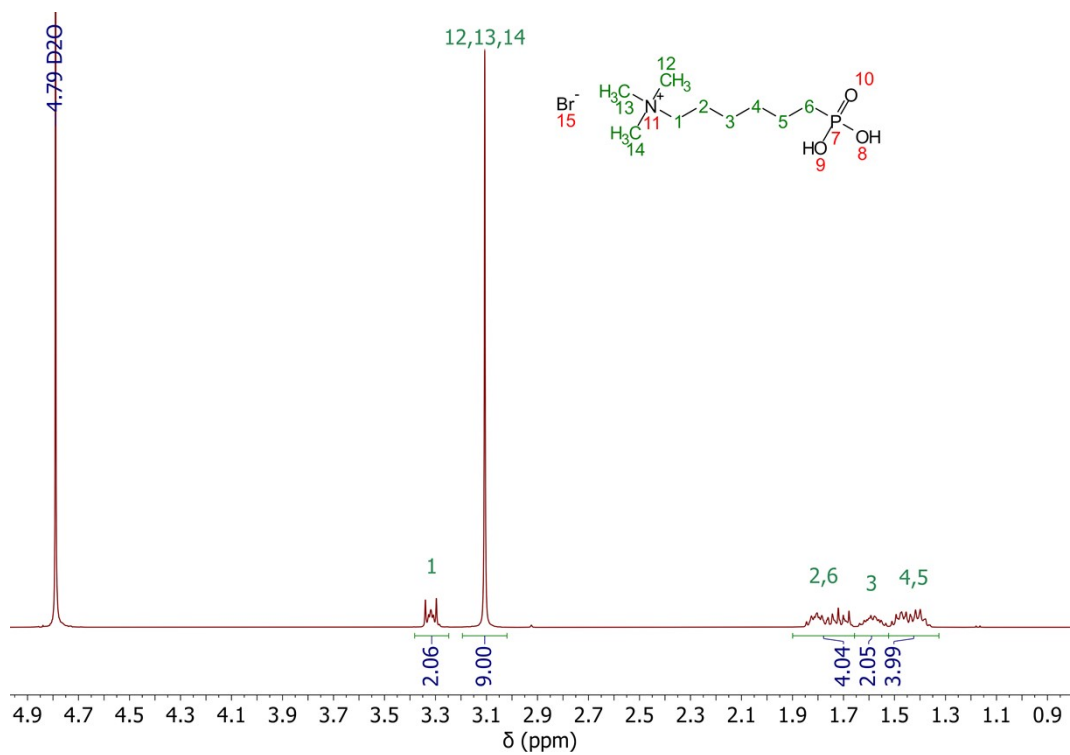

Figure S9: <sup>1</sup>H NMR spectrum of NMe<sub>3</sub><sup>+</sup>C<sub>6</sub>PA.

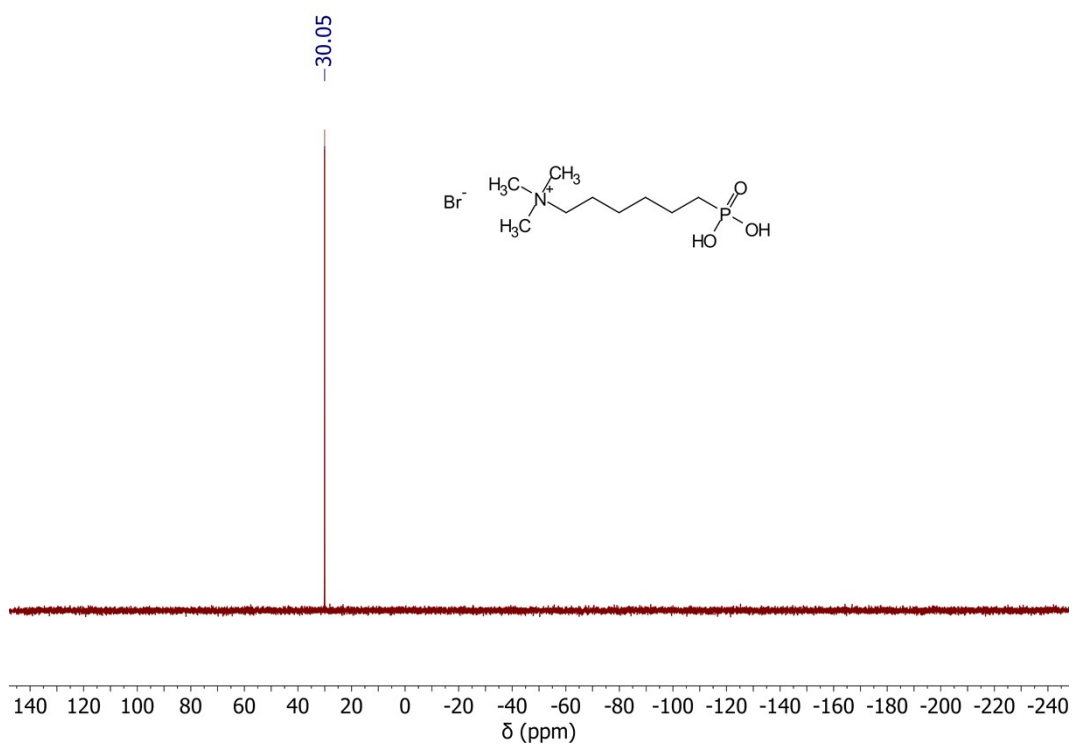

**Figure S 10:**  $^{31}\text{P}$  NMR spectrum of  $\text{NMe}_3^+\text{C}_6\text{PA}$ .

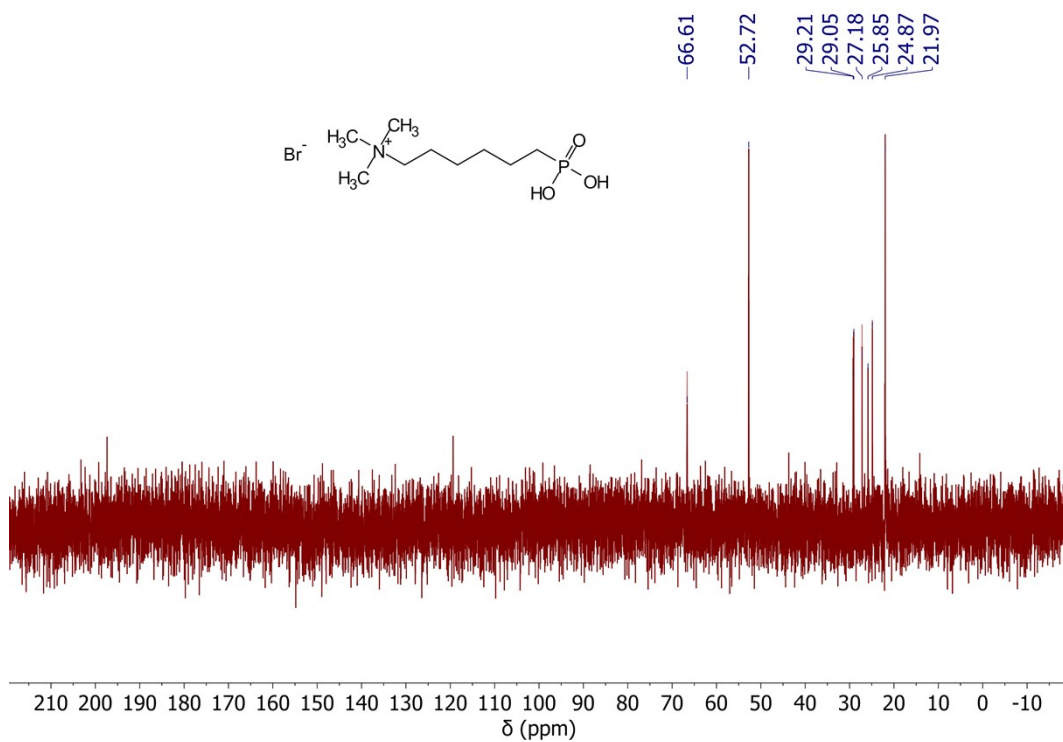

**Figure S11:**  $^{13}\text{C}$  NMR spectrum of  $\text{NMe}_3^+\text{C}_6\text{PA}$ .

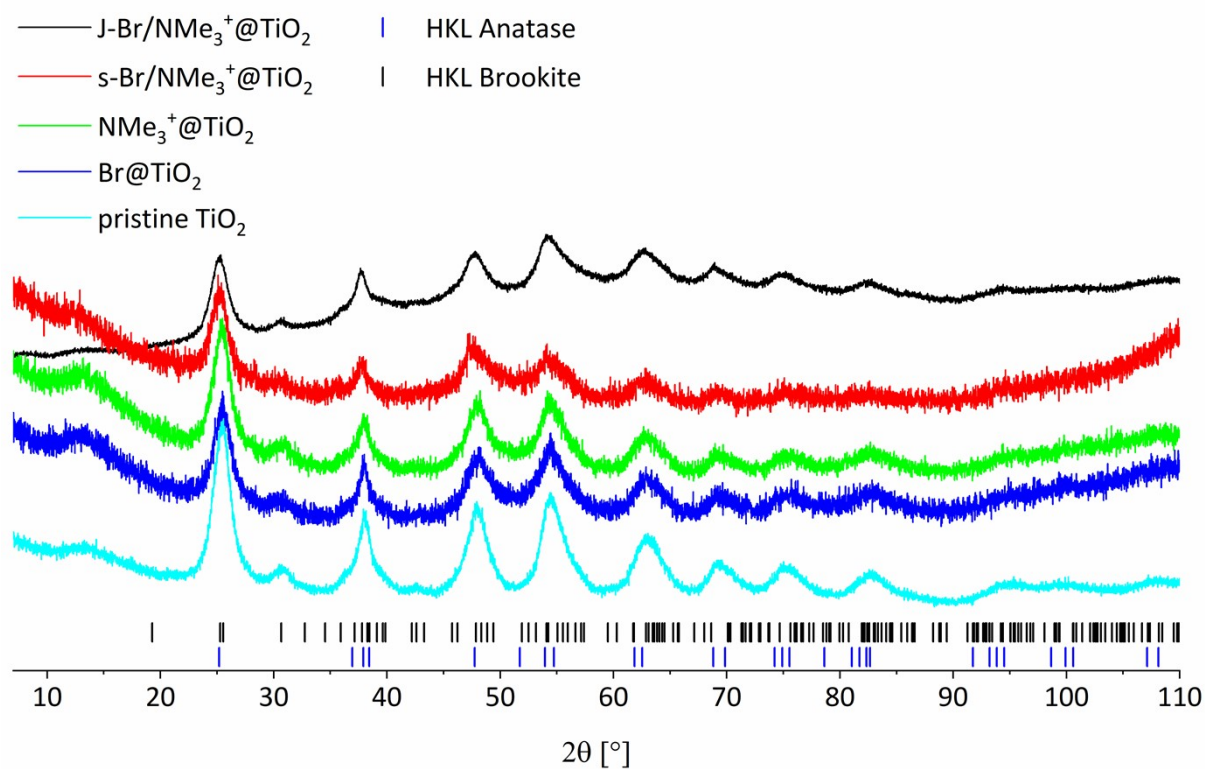

**Figure S12:** PXRD pattern of pristine and modified TiO<sub>2</sub> particles with *hkl* ticks for anatase and brookite.

**Table S1:** Chemical shifts from solid-state <sup>31</sup>P CP-MAS NMR.

| Sample                                               | <sup>31</sup> P chemical shifts fitted with Gaussian |
|------------------------------------------------------|------------------------------------------------------|
|                                                      | [ppm]                                                |
| BrC <sub>6</sub> PA                                  | 32.5                                                 |
| NMe <sub>3</sub> <sup>+</sup> C <sub>6</sub> PA      | 32.1                                                 |
| Br@TiO <sub>2</sub>                                  | 36.5; 29.8; 25.4; 20.3; 17.9                         |
| NMe <sub>3</sub> <sup>+</sup> @TiO <sub>2</sub>      | 35.7; 26.1; 23.8                                     |
| s-Br/NMe <sub>3</sub> <sup>+</sup> @TiO <sub>2</sub> | 34.4; 27.3; 25.6                                     |
| J-Br/NMe <sub>3</sub> <sup>+</sup> @TiO <sub>2</sub> | 31.9; 26.8; 22.0; 13.5                               |

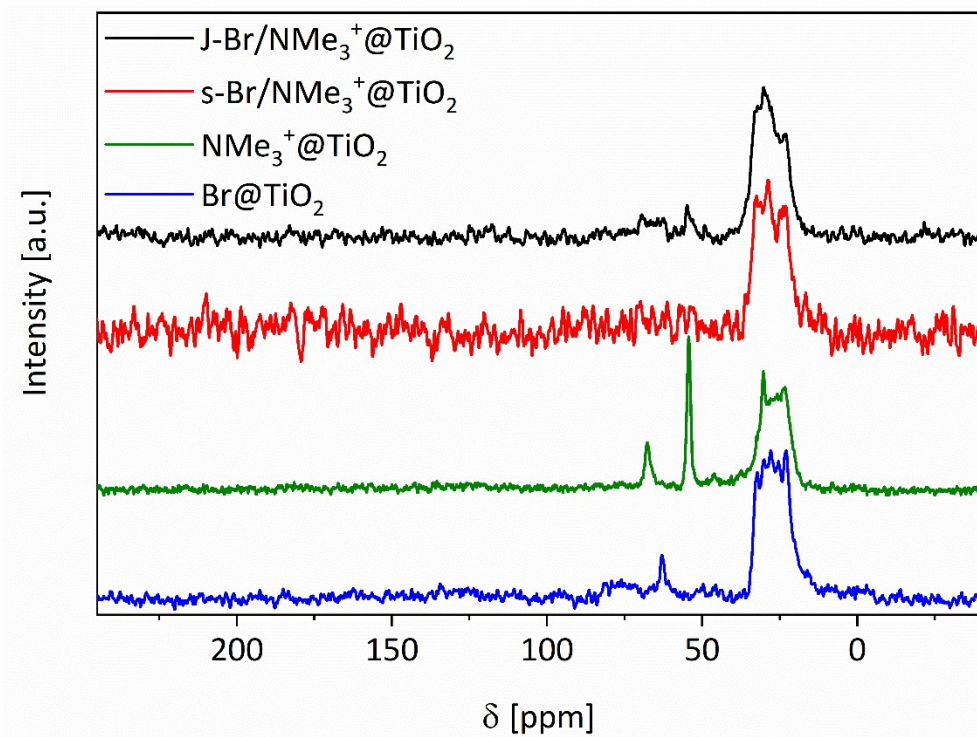

**Figure S13:** Solid-state  $^{13}\text{C}$  CP-MAS NMR spectra of modified titania particles.

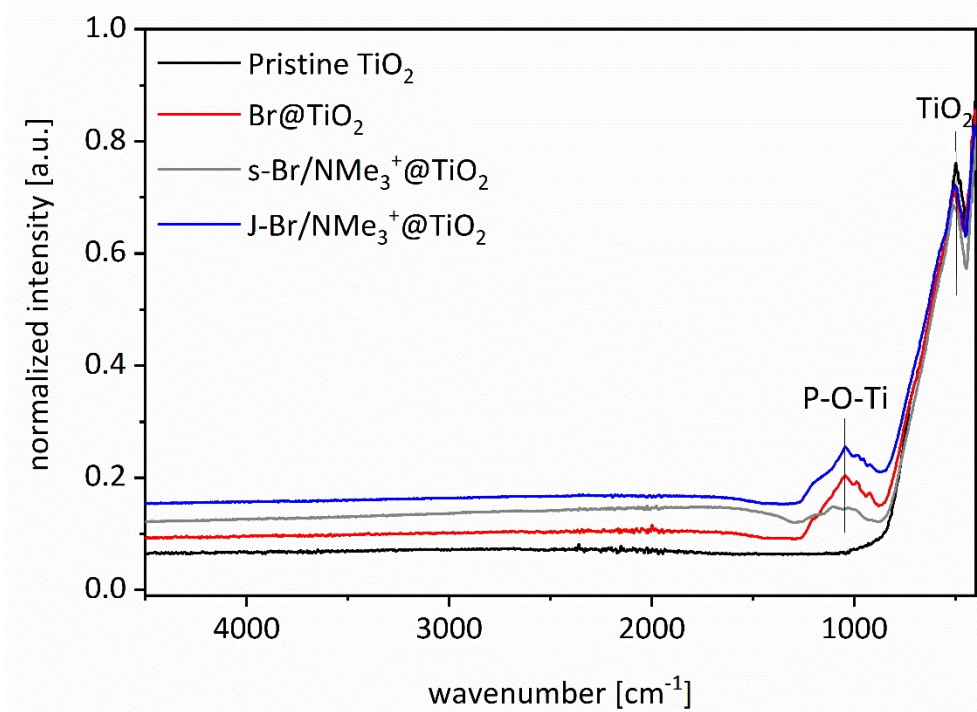

**Figure S14:** FTIR spectra of pristine and modified particles after TGA.



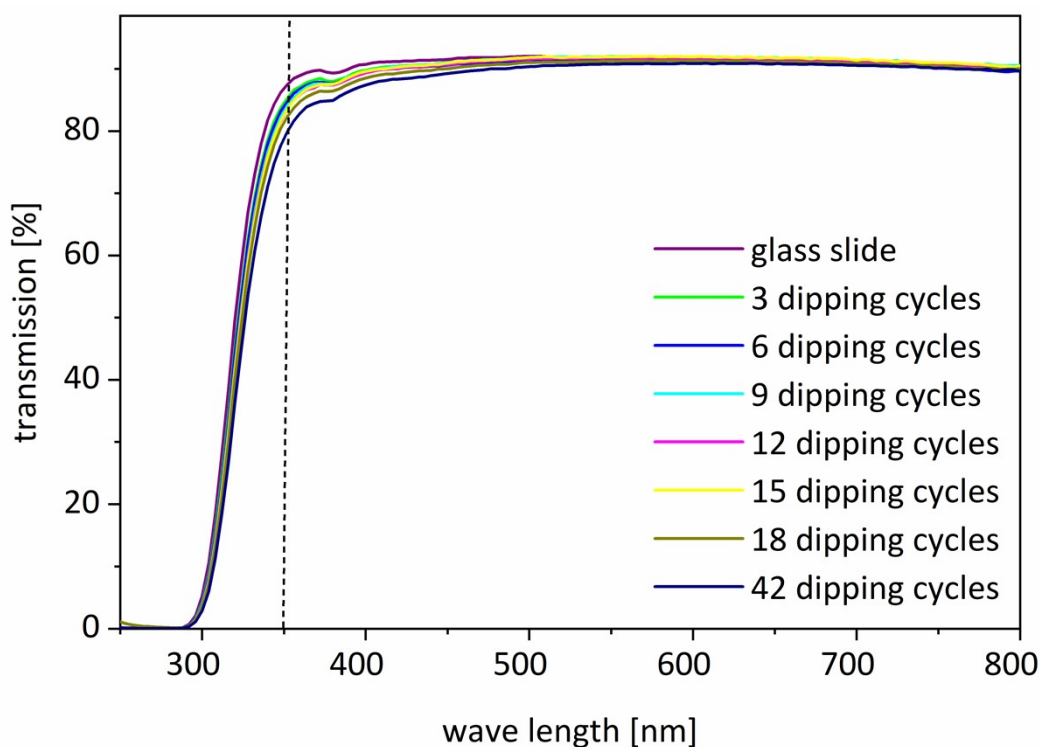

**Figure S15:** UV-Vis spectra of glass slides coated with J-Br/NMe<sub>3</sub><sup>+</sup>@TiO<sub>2</sub>.

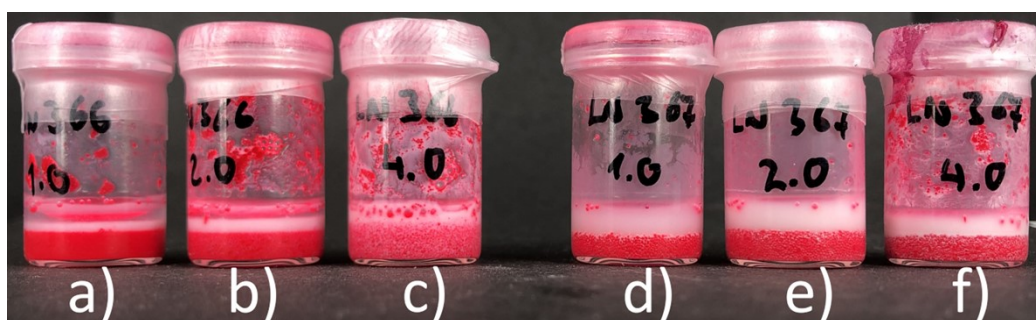

**Figure S16:** Photographs of chloroform-water Pickering emulsions with  $\varphi_{\text{oil}} = 50 \text{ vol}\%$  stabilized by statistically modified s-Br/NMe<sub>3</sub><sup>+</sup>@TiO<sub>2</sub> (a - c) and anisotropically modified J-Br/NMe<sub>3</sub><sup>+</sup>@TiO<sub>2</sub> (d - f) with 1.0 wt% (a, d), 2.0 wt% (b, e) and 4.0 wt% (c, f) particle content. Chloroform is coloured with Lumogen Red 305.

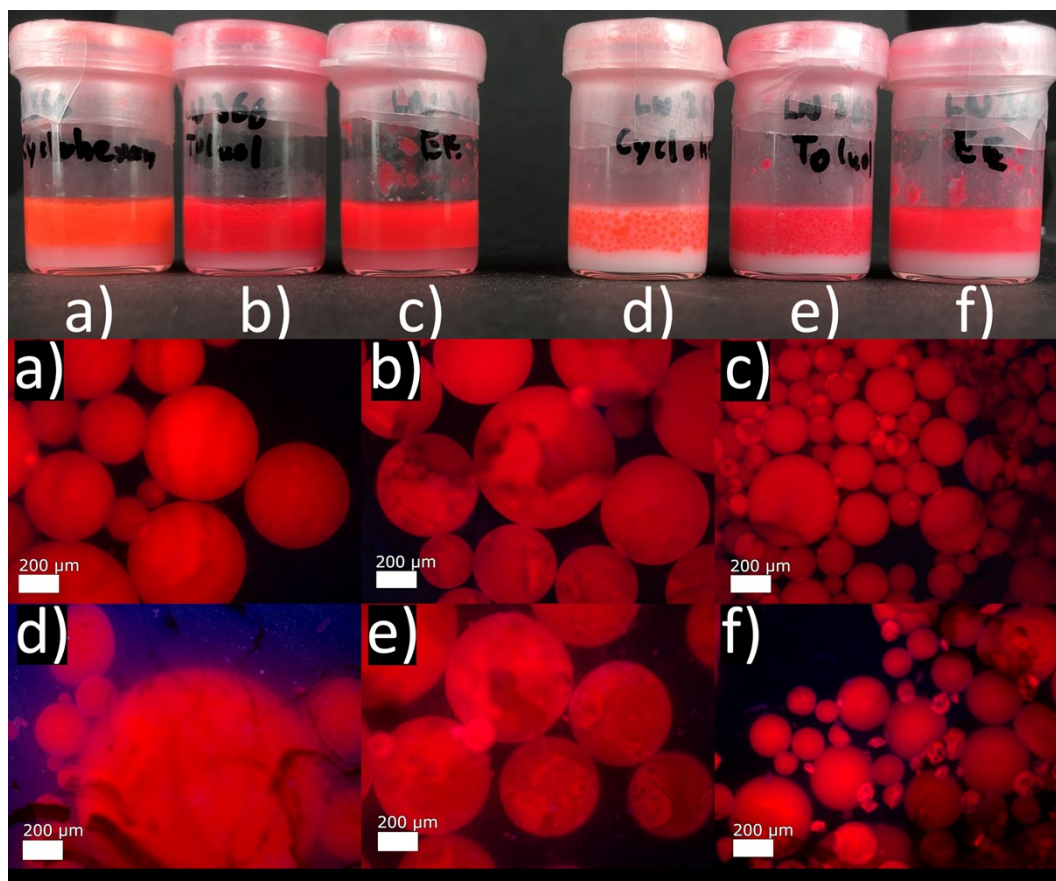

**Figure S17:** Photographs and microscopic images of oil-water Pickering emulsions stabilized by J-Br/NMe<sub>3</sub><sup>+</sup>@TiO<sub>2</sub> (a – c) and s-Br/NMe<sub>3</sub><sup>+</sup>@TiO<sub>2</sub> (d – f). As oil phase cyclohexane (a, d), toluene (b, e) and ethylene acetate (c, f) are used. Particle content is 0.8 wt% at pH = 2.5. Volume ratio is  $\phi_{\text{oil}} = 50 \text{ vol}\%$ .

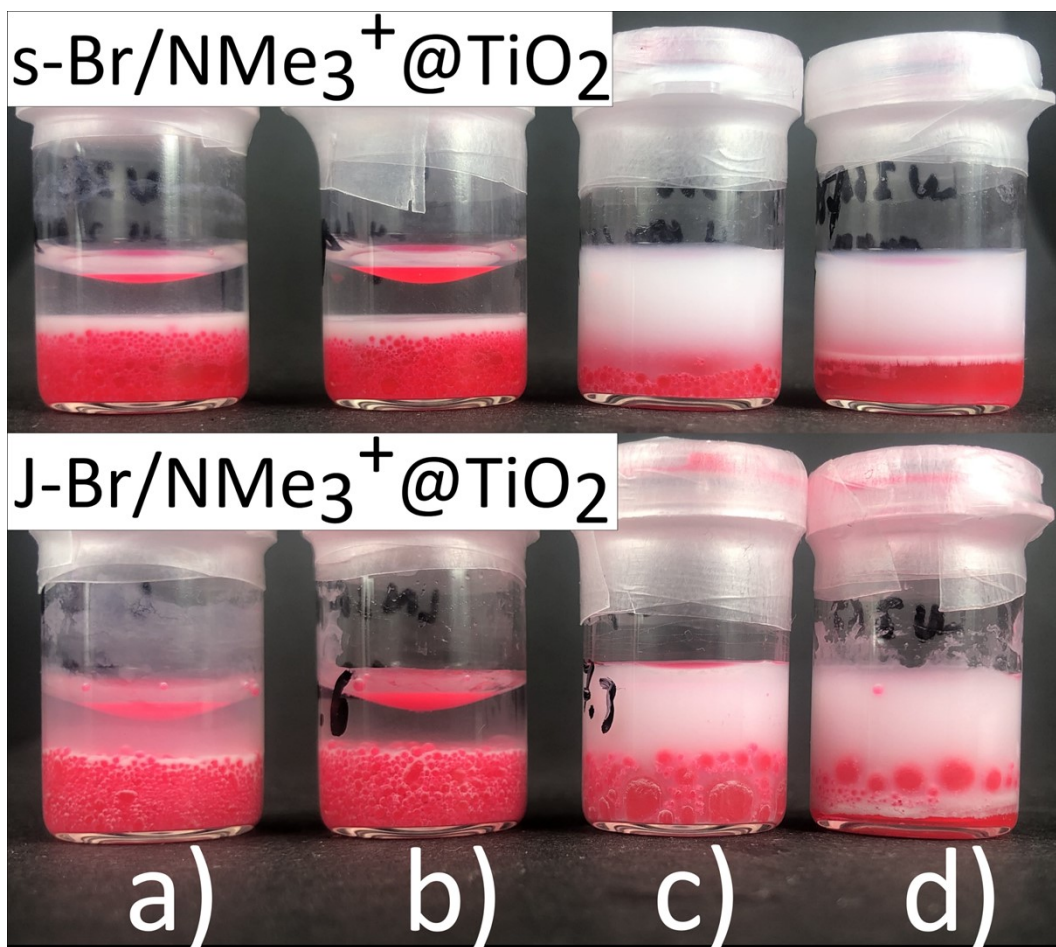

**Figure S18:** Photographs of chloroform-water Pickering emulsions with  $\varphi_{\text{oil}} = 50$  vol% stabilized by statistically modified s-Br/NMe<sub>3</sub><sup>+</sup>@TiO<sub>2</sub> (upper picture) and anisotropically modified J-Br/NMe<sub>3</sub><sup>+</sup>@TiO<sub>2</sub> (lower picture) with a particle content of 0.8 wt% at pH of 2.0 (a), 4.5 (b), 7.0 (c) and 9.0 (d). Chloroform is coloured with Lumogen Red 305.
